# Supplementary material for: Synthesis and the photophysical and biological properties of tricarbonyl Re(i) diimine complexes bound to thiotetrazolato ligands
Source: Royal Society of Chemistry journal article supplement (doi:10.1039/d2dt03237f), 2023-01-01
Supplement: d2dt03237f1.pdf [file d2dt03237f1.pdf]

## Synthesis, photophysical and biological properties of tricarbonyl Re(I) diimine complexes bound to thiotetrazolato ligands

Liam J. Stephens<sup>#</sup>, Elena Dallerba<sup>#</sup>, Jenisi T.A. Kelderman, Aviva Levina, Melissa V. Werrett,  
Peter A. Lay, Massimiliano Massi<sup>\*</sup> and Philip C. Andrews<sup>\*</sup>

### NMR Details

Collated <sup>1</sup>H and <sup>13</sup>C NMR Spectra of all Re complexes (Figures S1-S24)

### Crystallography Details

Tabulated data for crystal structures of **RebipyLn** and **RephenLn** (Table S1)

Molecular structure of selected complexes (Figures S25 - Figure S34)

### Powder X-ray diffraction

PXRD for complex **RebipyL4** (Figure S35)

### Stability Studies

Stability of **RephenL2** in DMSO (Figure S36)

# RebipyL1

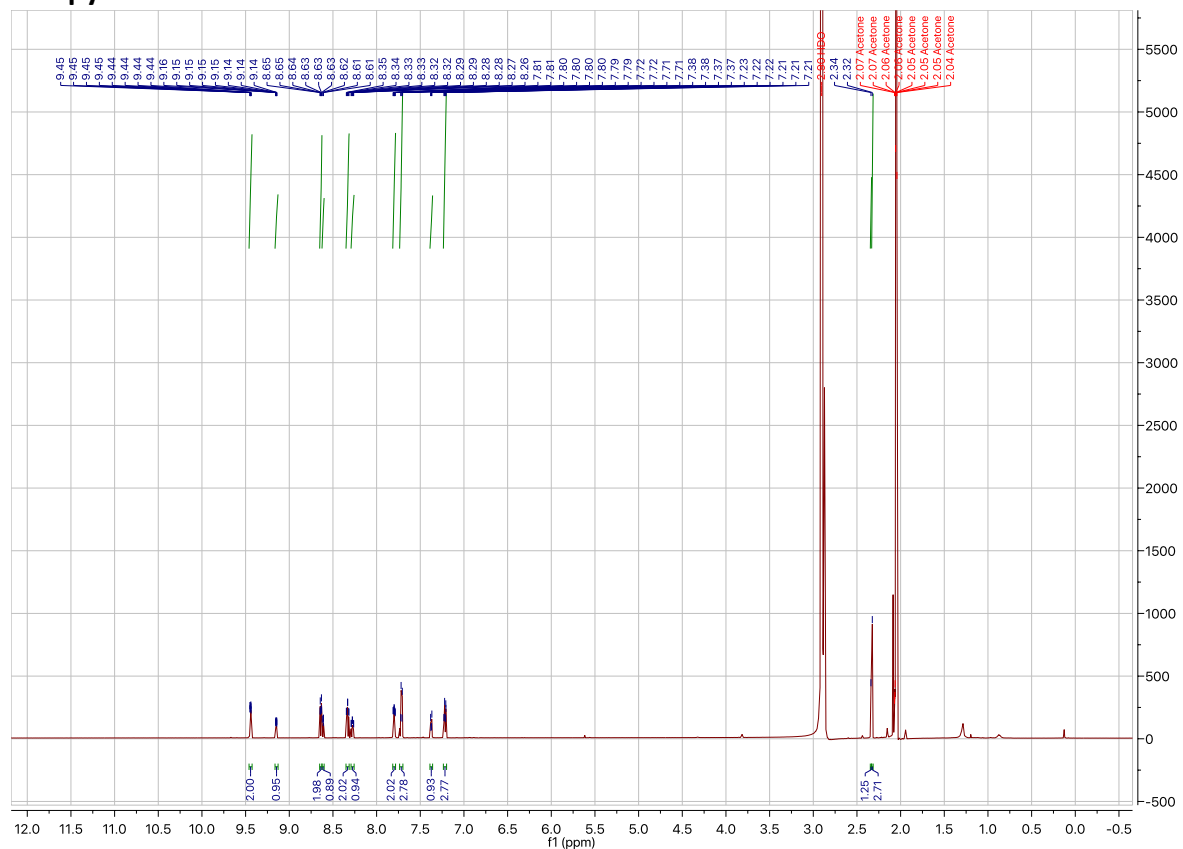

Figure S1.  $^1\text{H}$  NMR for  $[\text{Re}(\text{bipy})(\text{CO})_3(\text{L1})]$ , RebipyL1

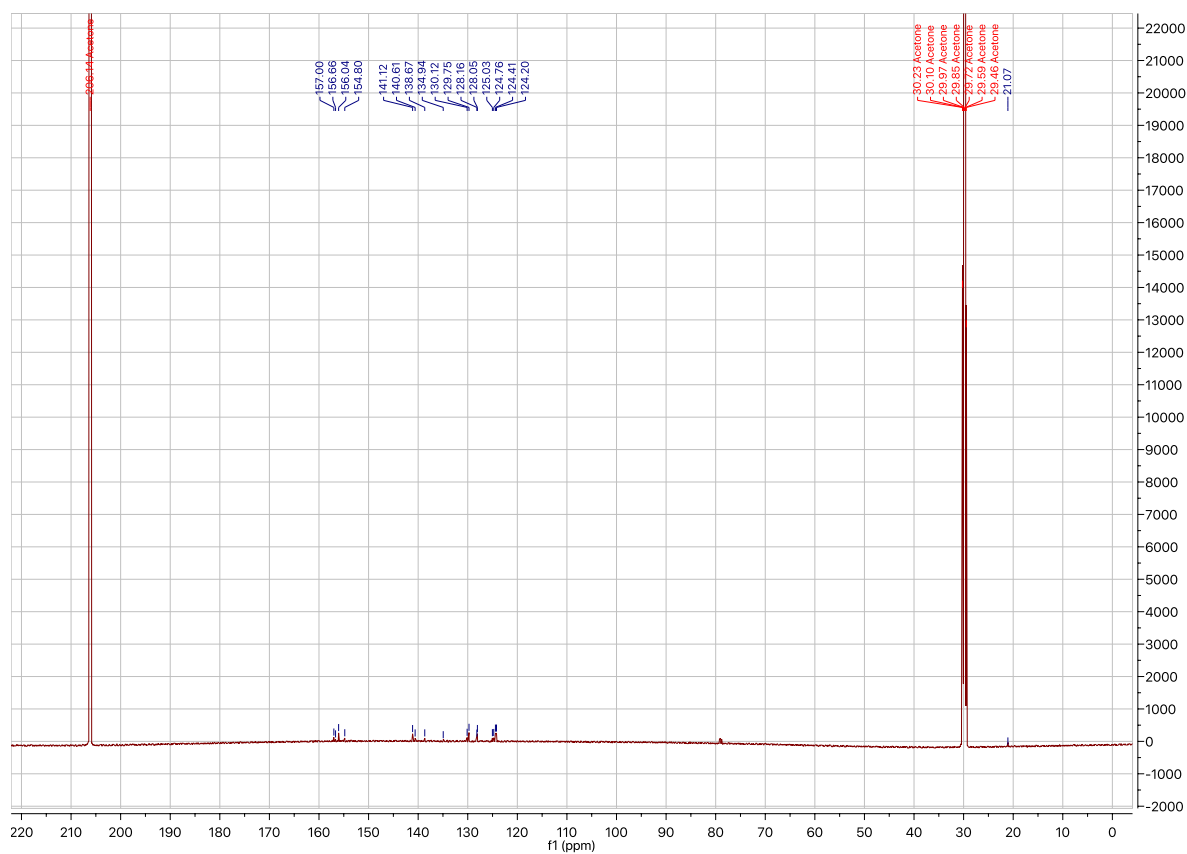

Figure S2.  $^{13}\text{C}$  NMR for  $[\text{Re}(\text{bipy})(\text{CO})_3(\text{L1})]$ , RebipyL1



### RebipyL3

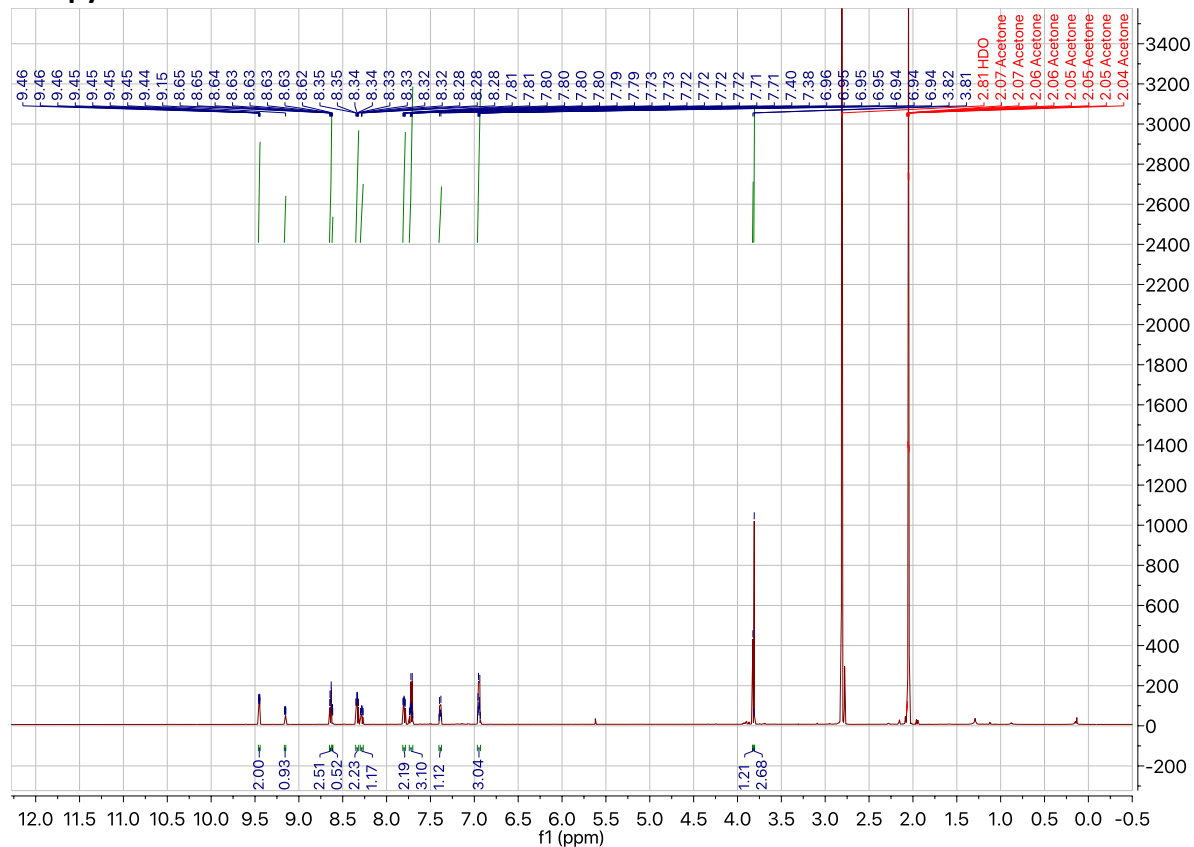

Figure S5.  $^1\text{H}$  NMR for  $[\text{Re}(\text{bipy})(\text{CO})_3(\text{L3})]$ , RebipyL3

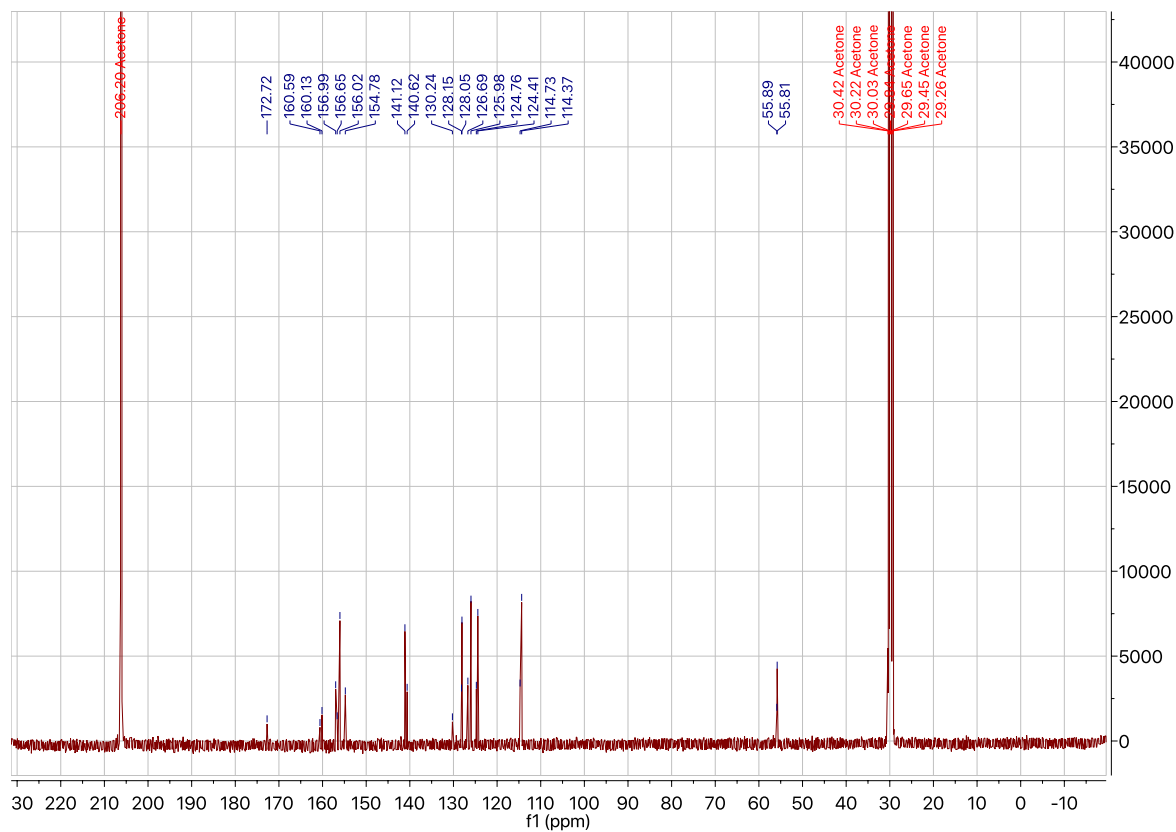

Figure S6.  $^{13}\text{C}$  NMR for  $[\text{Re}(\text{bipy})(\text{CO})_3(\text{L3})]$ , RebipyL3

# RebipyL4

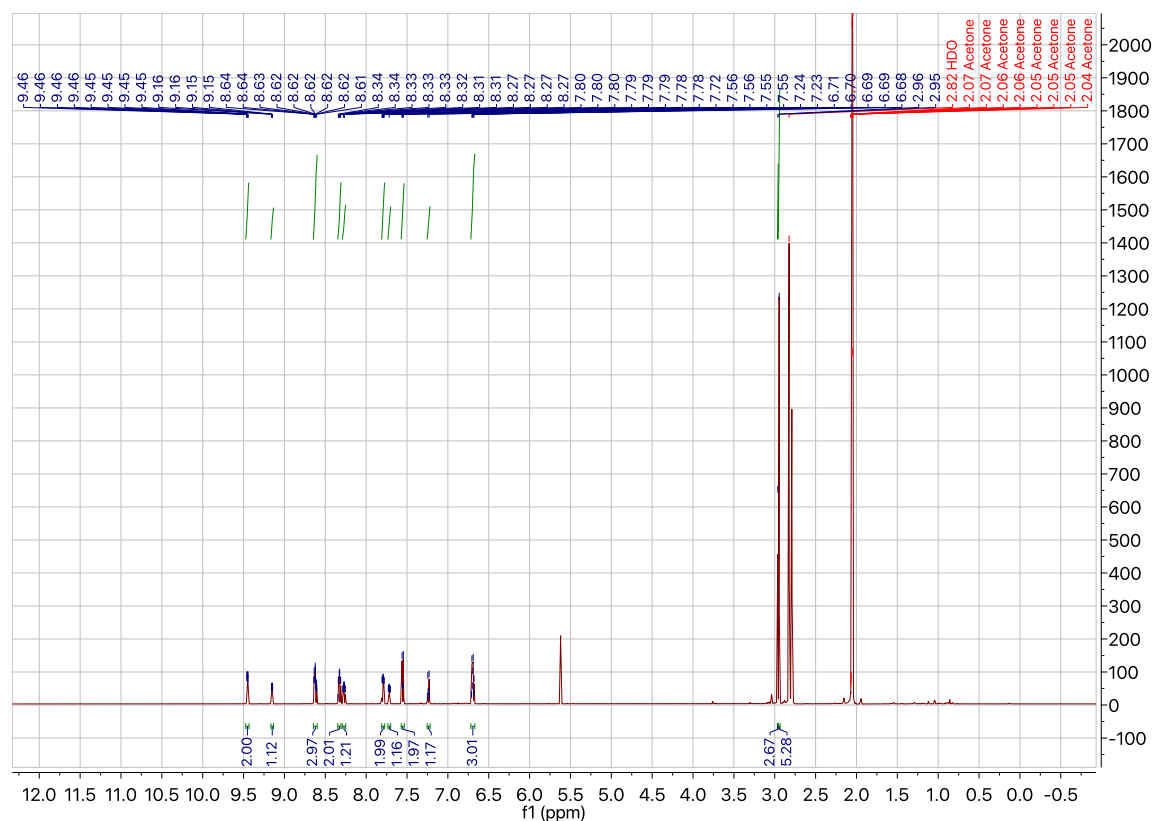

Figure S7. <sup>1</sup>H NMR for [Re(bipy)(CO)<sub>3</sub>(L4)], RebipyL4

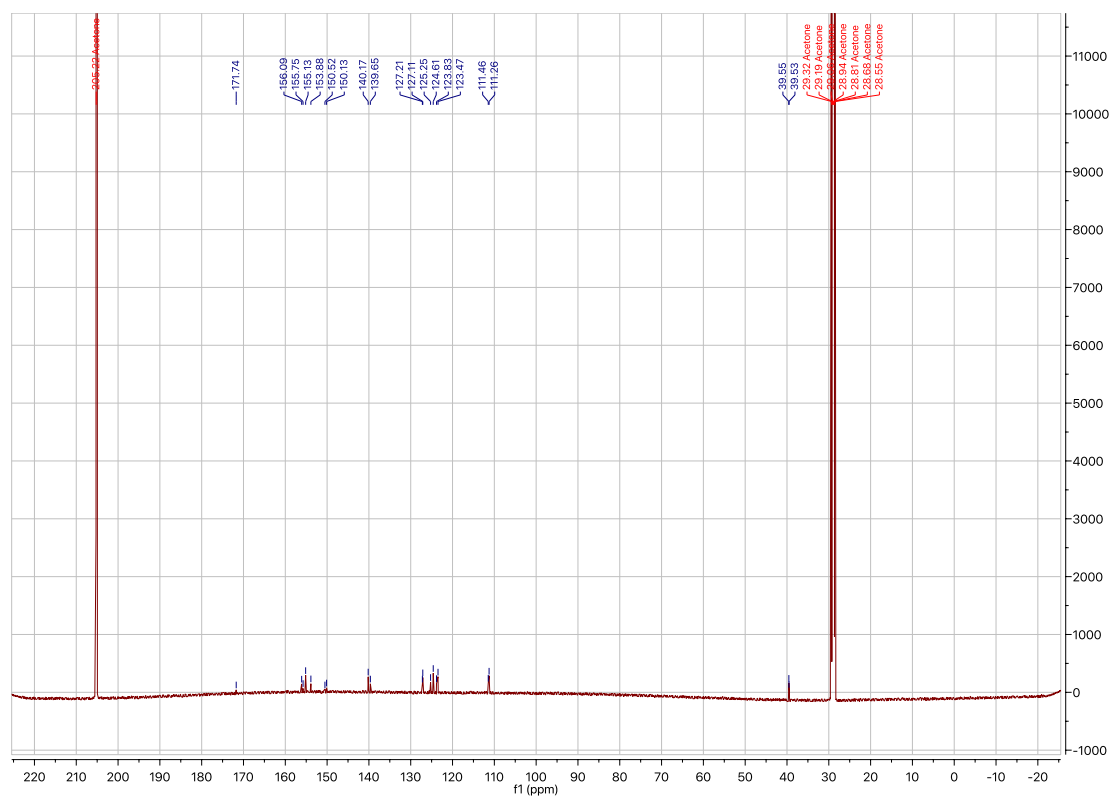

Figure S8. <sup>13</sup>C NMR for [Re(bipy)(CO)<sub>3</sub>(L4)], RebipyL4

# RebipyL5

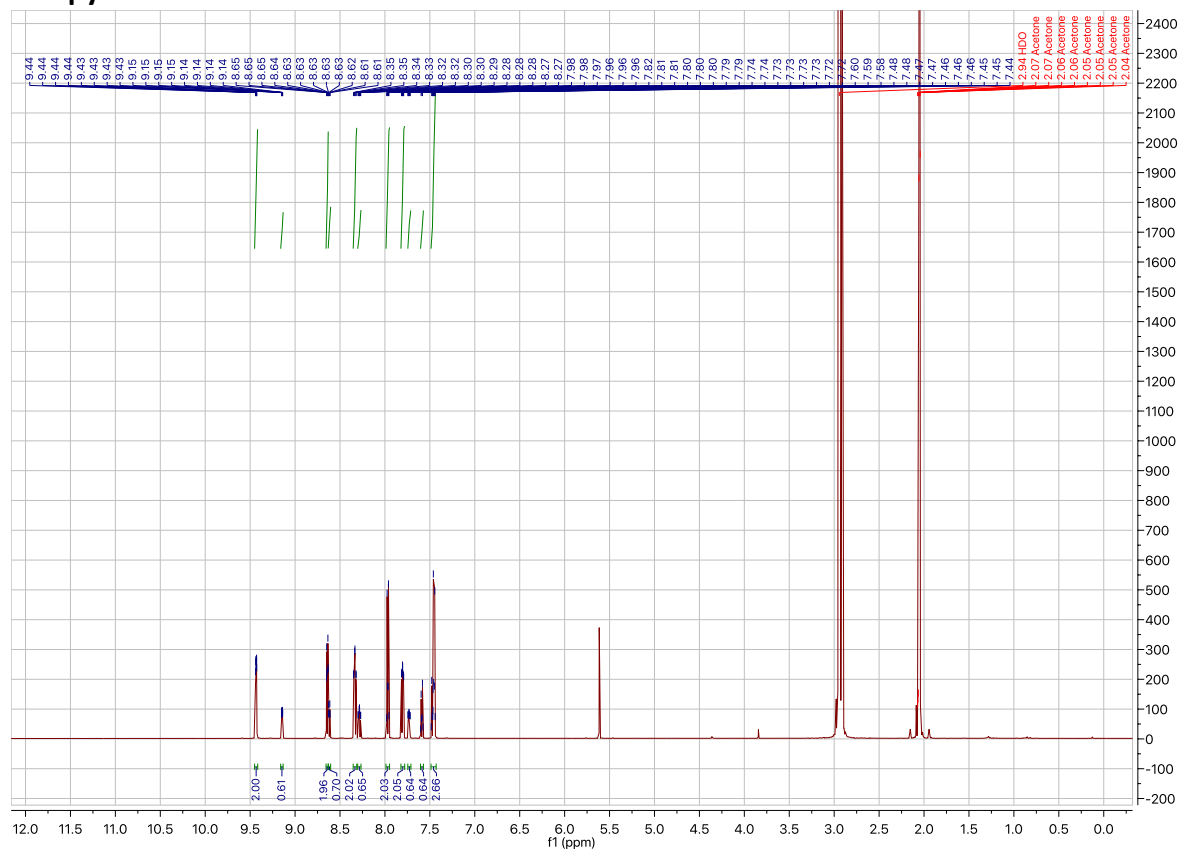

Figure S9.  $^1\text{H}$  NMR for  $[\text{Re}(\text{bipy})(\text{CO})_3(\text{L5})]$ , RebipyL5

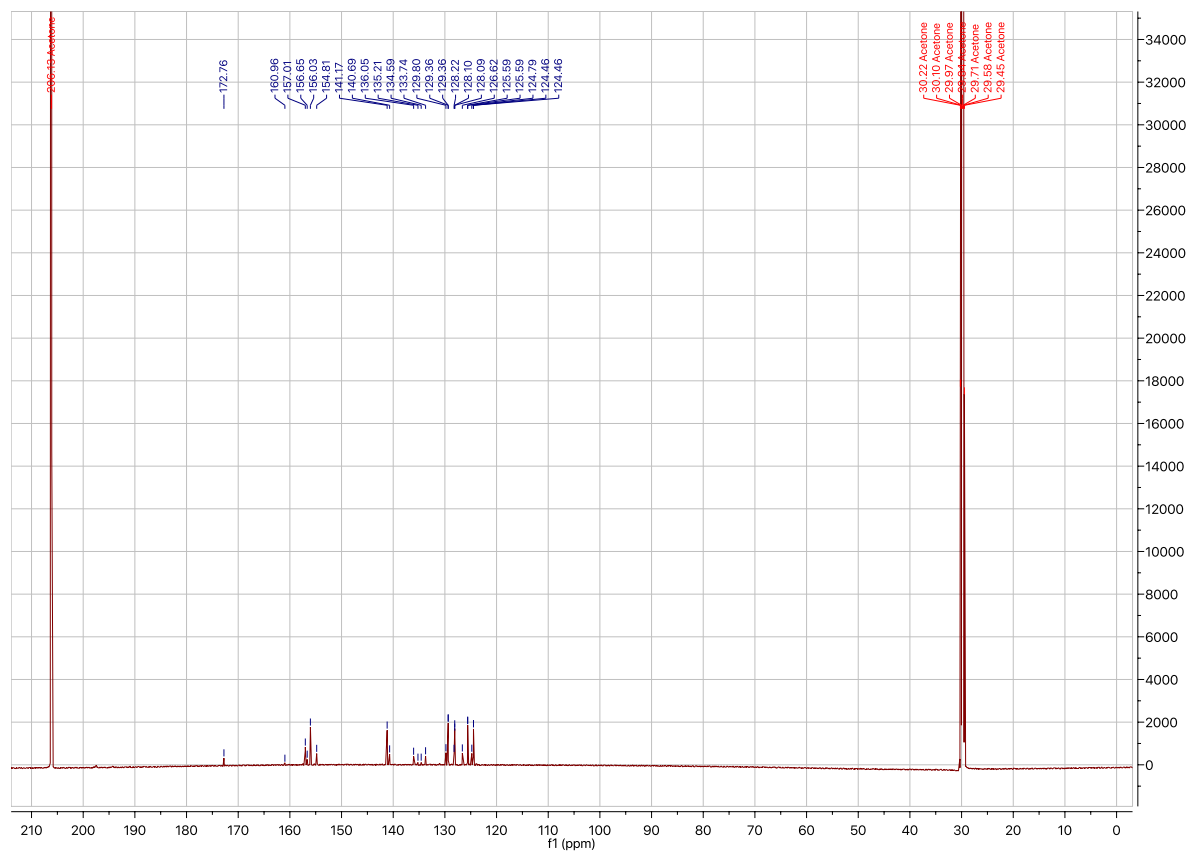

Figure S10.  $^{13}\text{C}$  NMR for  $[\text{Re}(\text{bipy})(\text{CO})_3(\text{L5})]$ , RebipyL5

# RebipyL6

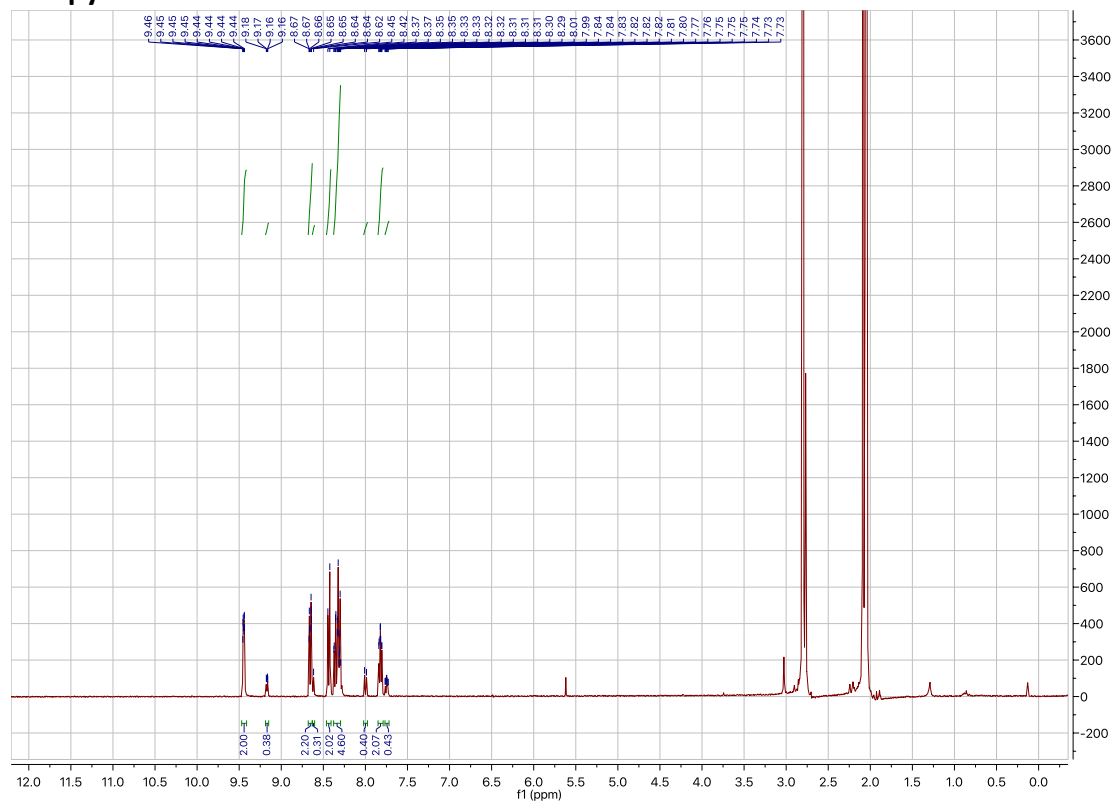

Figure S11.  $^1\text{H}$  NMR for  $[\text{Re}(\text{bipy})(\text{CO})_3(\text{L6})]$ , **RebipyL6**

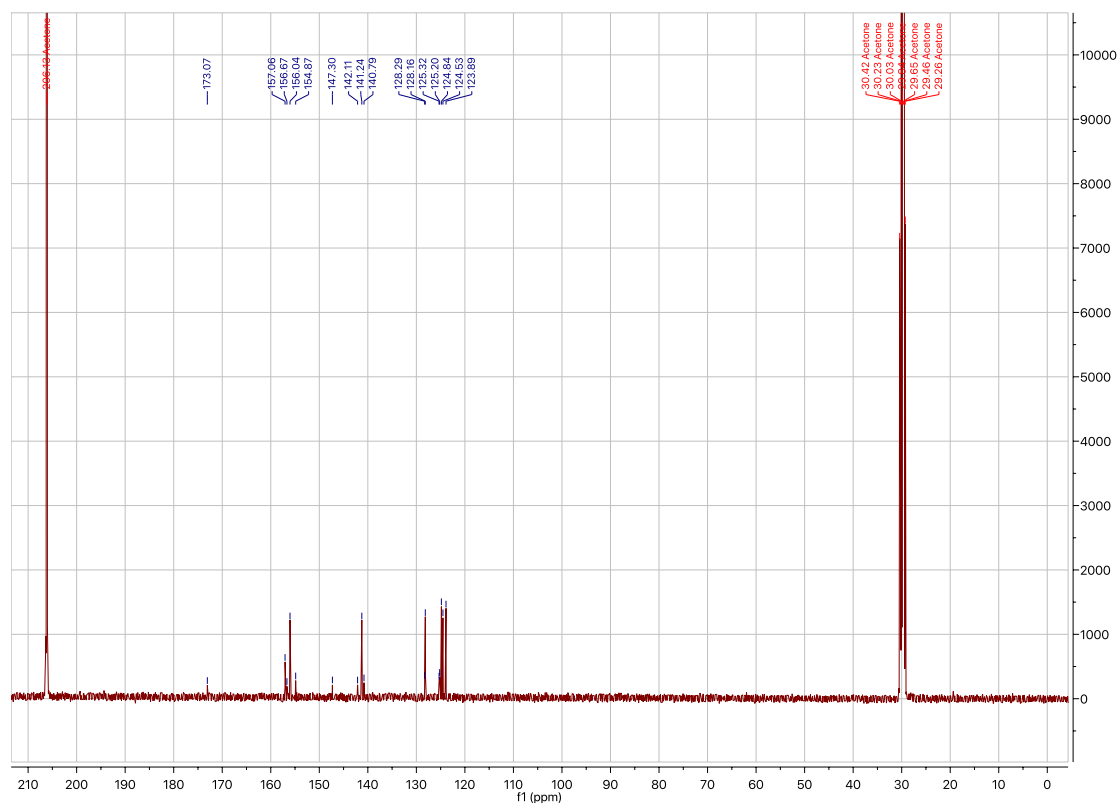

Figure S12.  $^{13}\text{C}$  NMR for  $[\text{Re}(\text{bipy})(\text{CO})_3(\text{L6})]$ , **RebipyL6**

# RephenL1

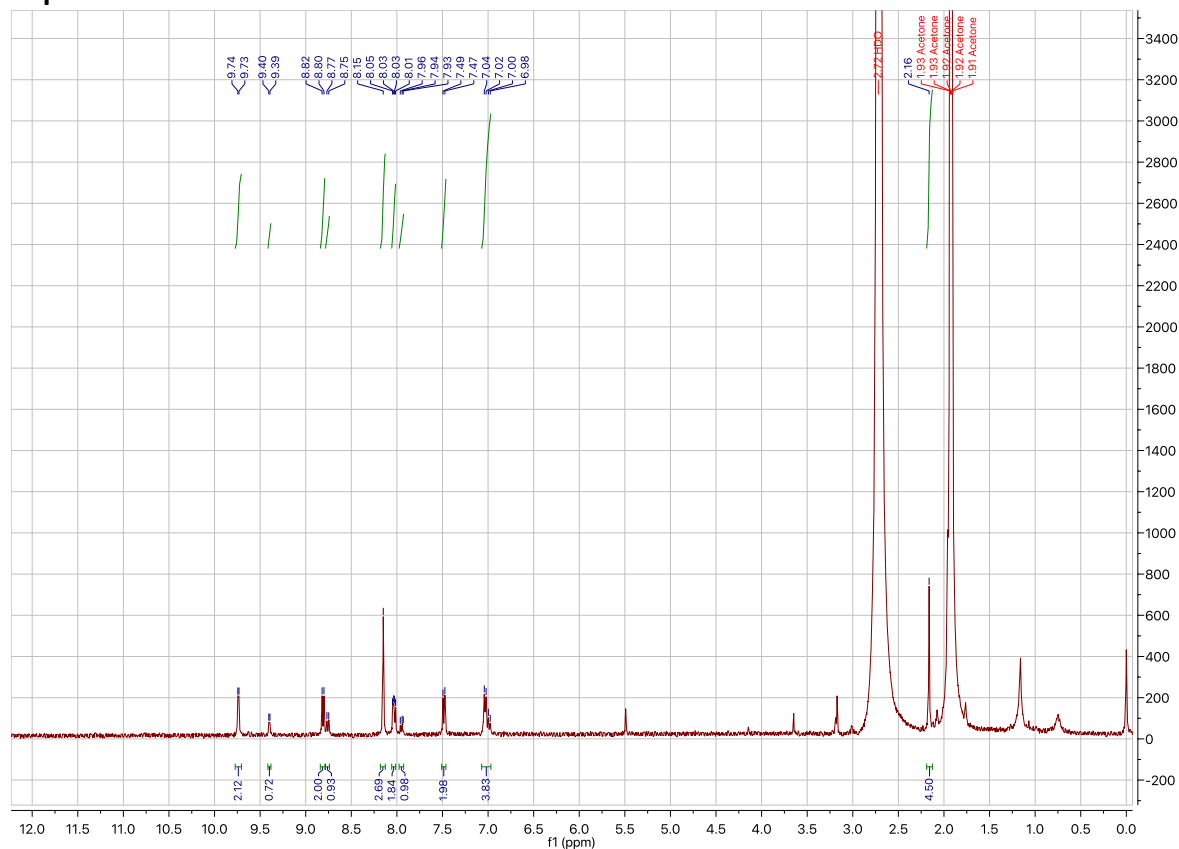

Figure S13. <sup>1</sup>H NMR for [Re(phen)(CO)<sub>3</sub>(L1)], RephenL1

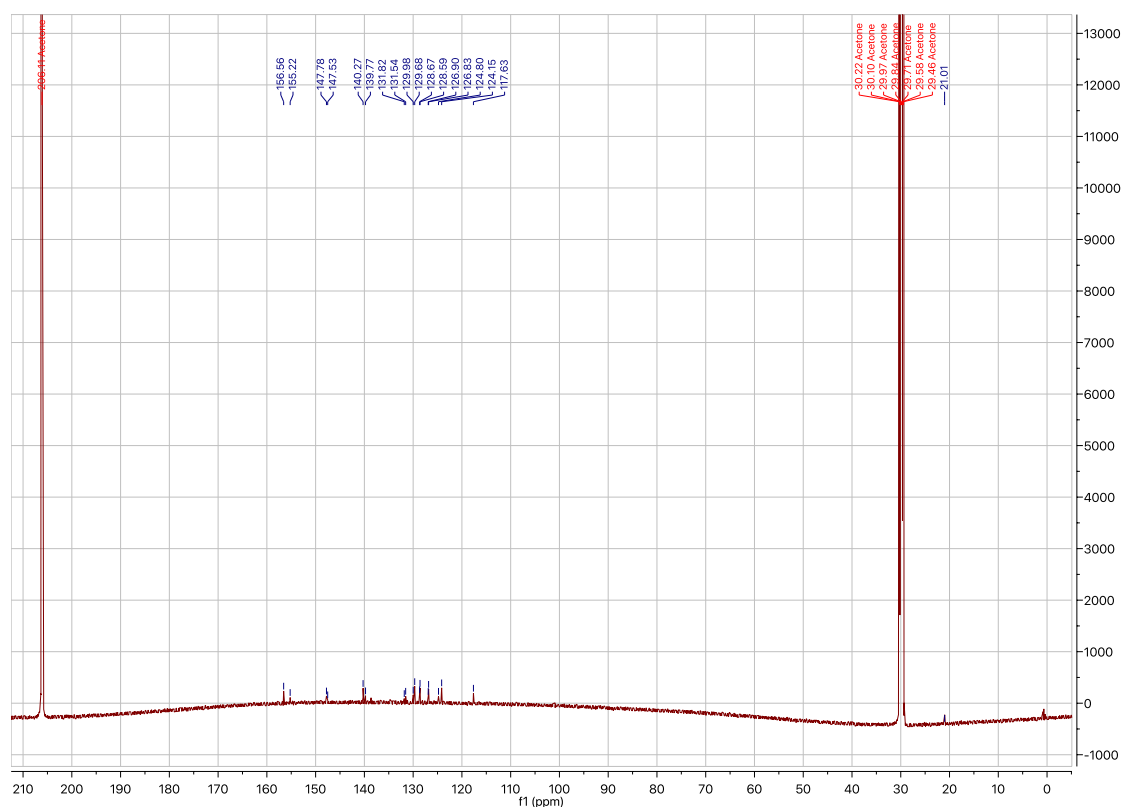

Figure S14. <sup>13</sup>C NMR for [Re(phen)(CO)<sub>3</sub>(L1)], RephenL1



# RephenL2

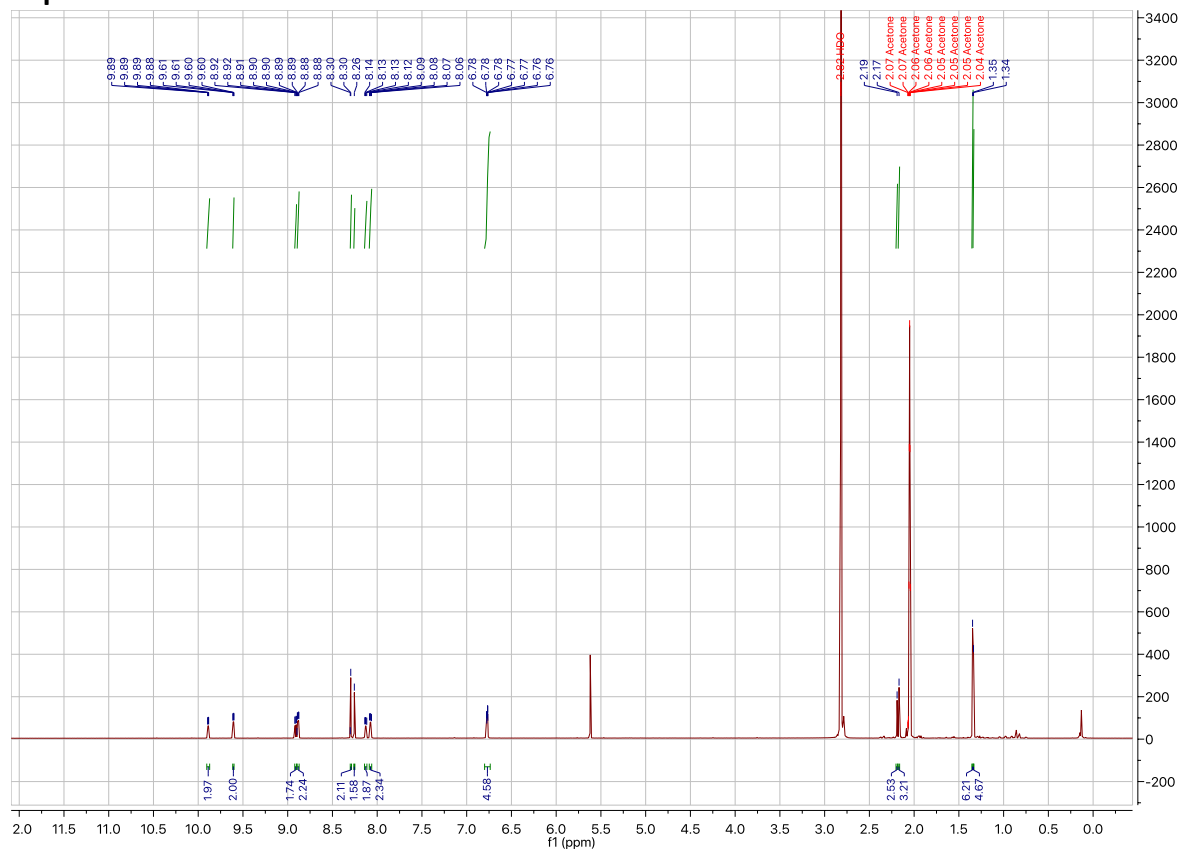

Figure S15.  $^1\text{H}$  NMR for  $[\text{Re}(\text{phen})(\text{CO})_3(\text{L2})]$ , RephenL2

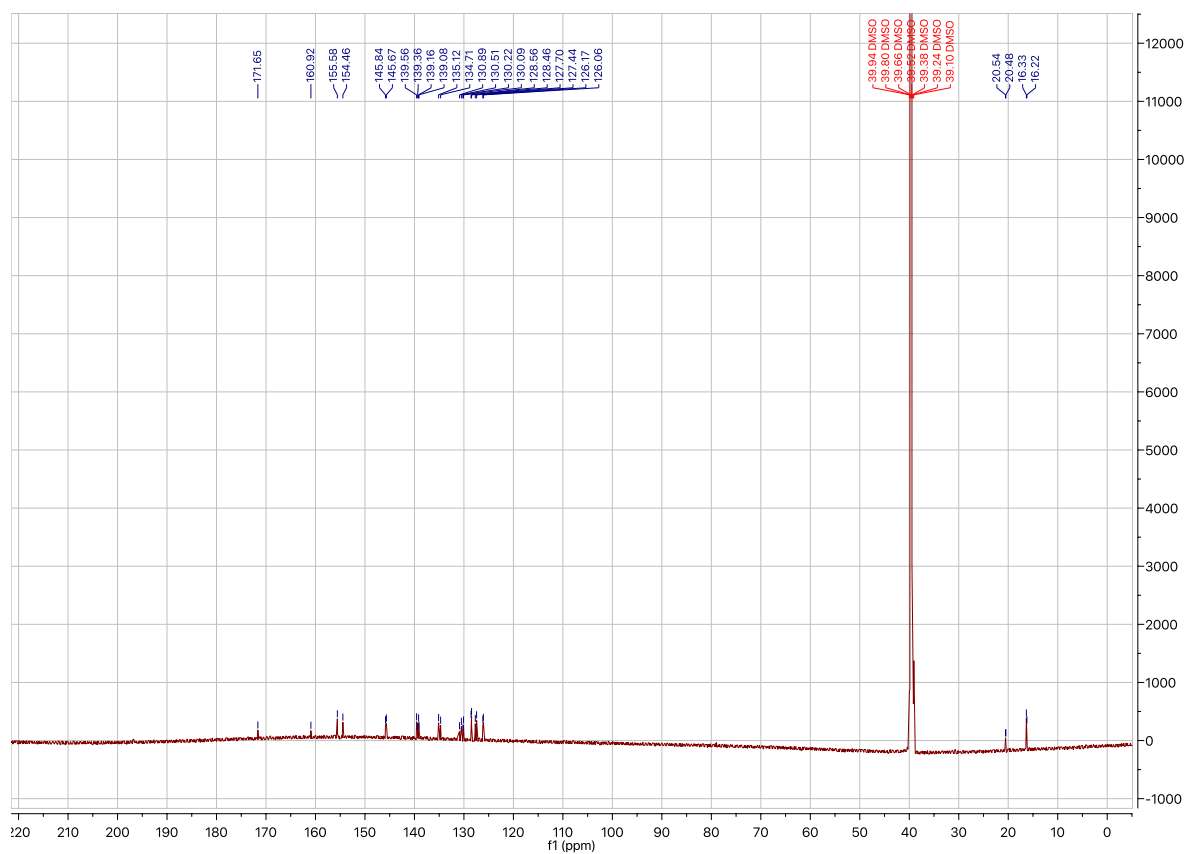

Figure S16.  $^{13}\text{C}$  NMR for  $[\text{Re}(\text{phen})(\text{CO})_3(\text{L2})]$ , RephenL2

# RephenL3

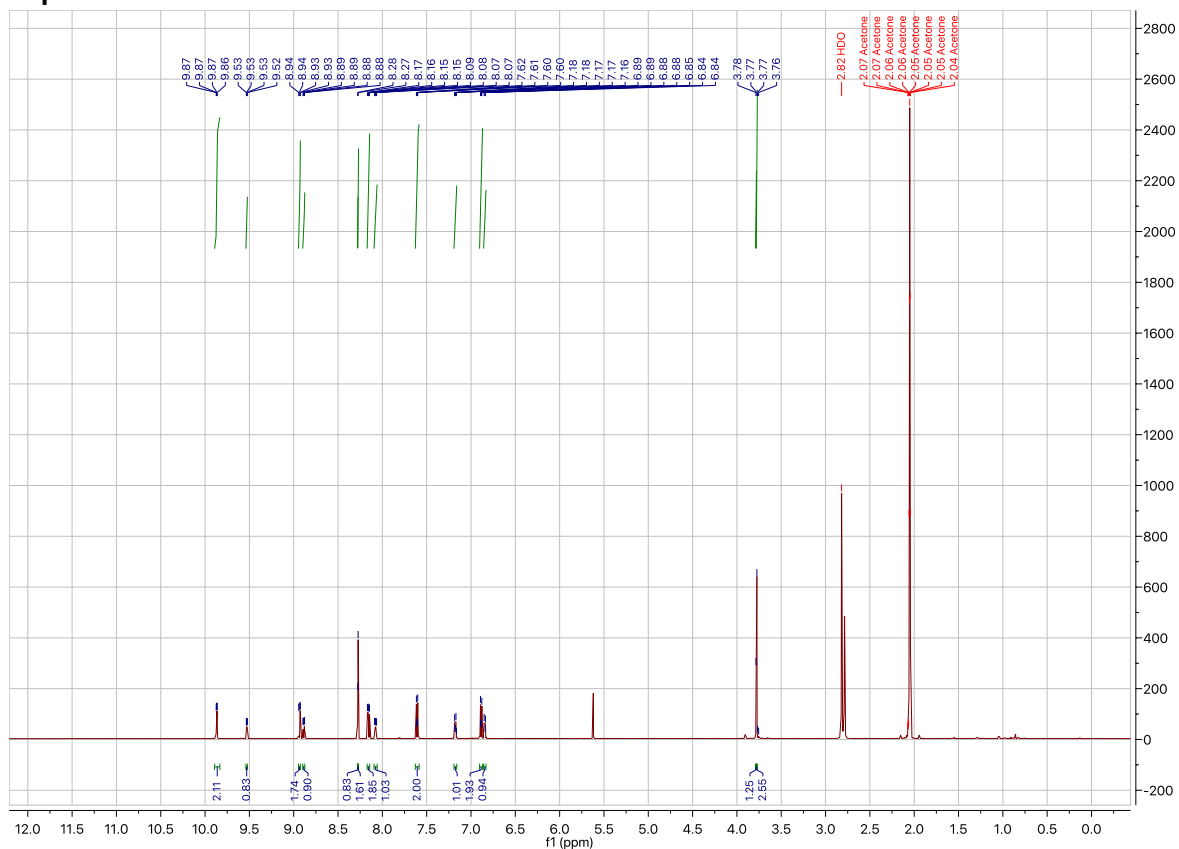

Figure S17. <sup>1</sup>H NMR for [Re(phen)(CO)<sub>3</sub>(L3)], RephenL3

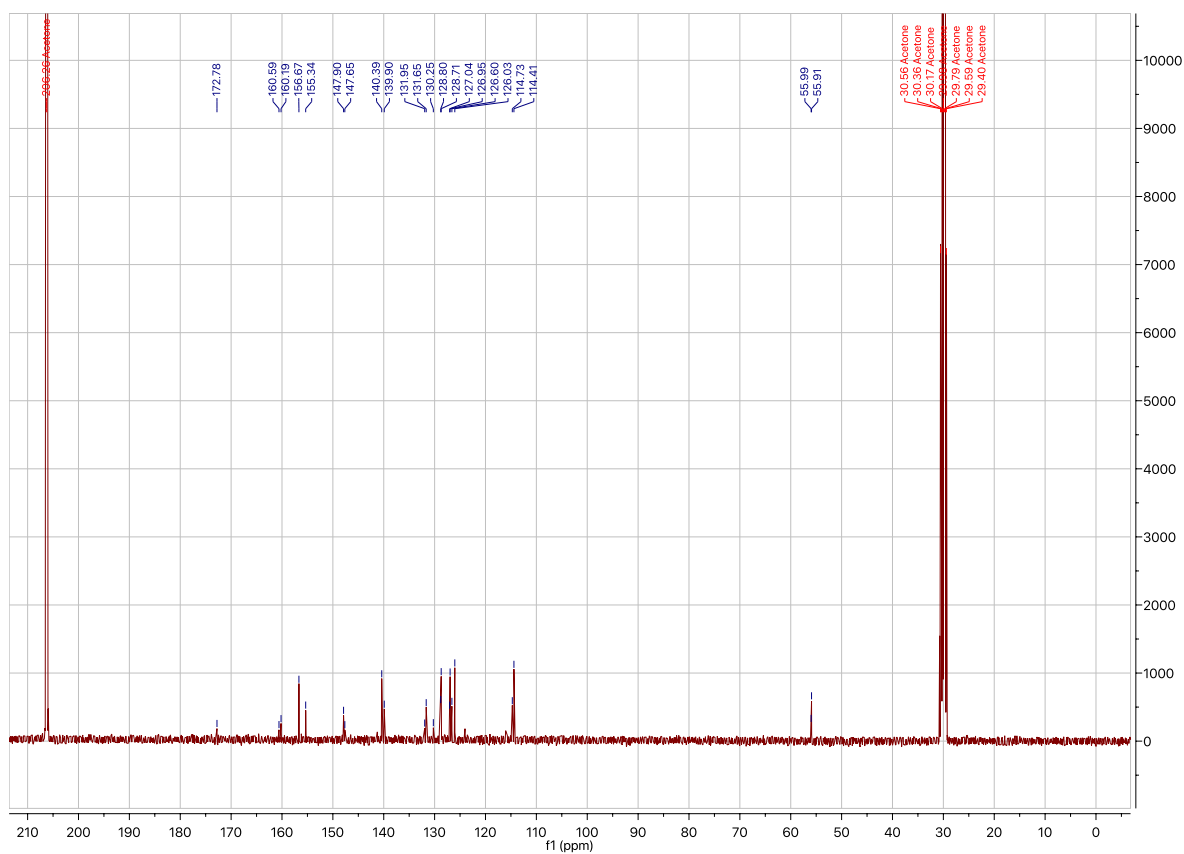

Figure S18. <sup>13</sup>C NMR for [Re(phen)(CO)<sub>3</sub>(L3)], RephenL3



# RephenL5

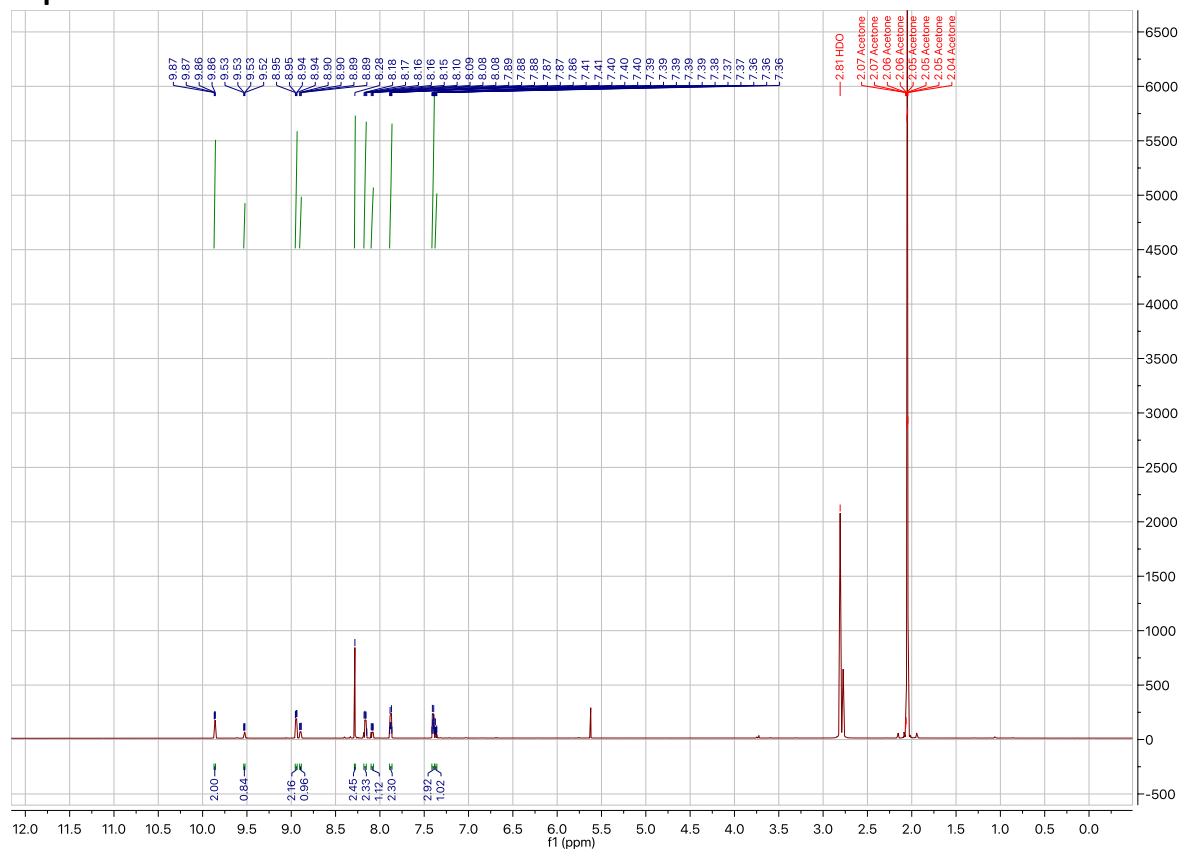

Figure S21. <sup>1</sup>H NMR for [Re(phen)(CO)<sub>3</sub>(L5)], RephenL5

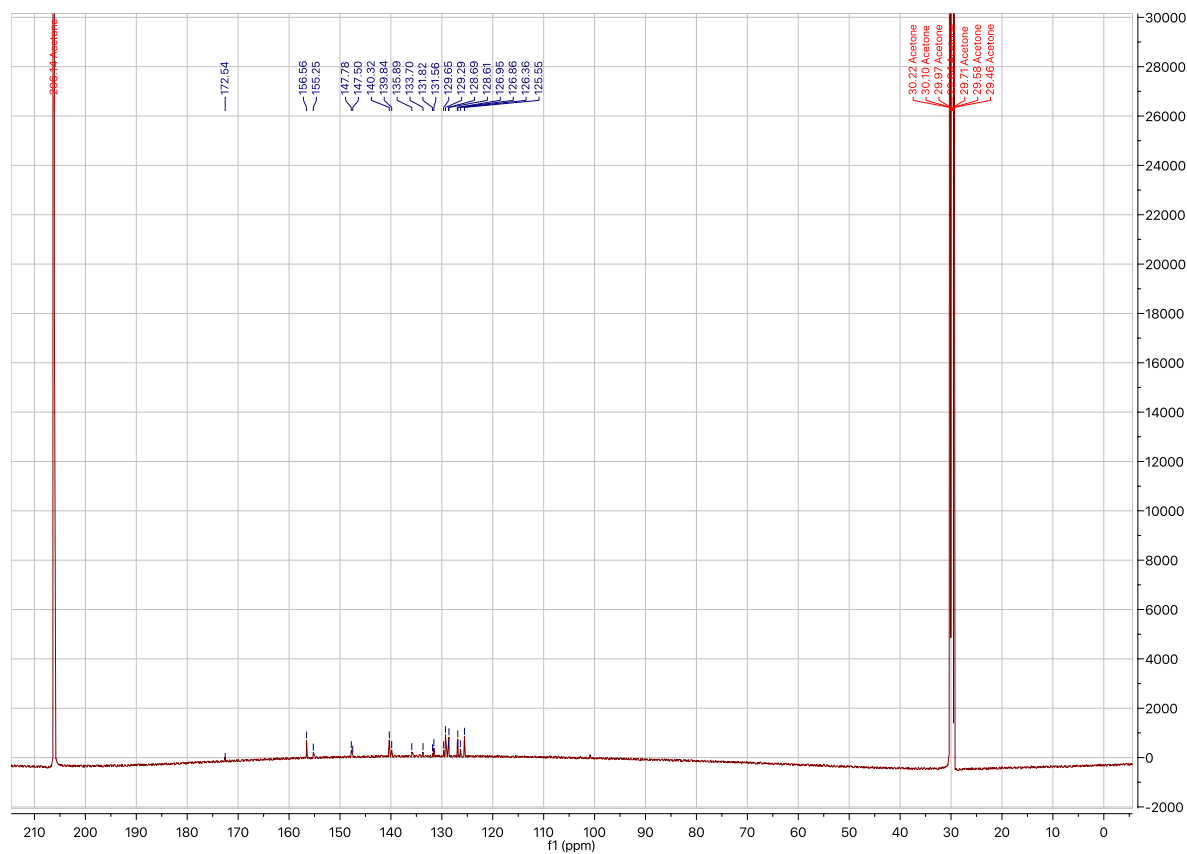

Figure S22. <sup>13</sup>C NMR for [Re(phen)(CO)<sub>3</sub>(L5)], RephenL5

# RephenL6

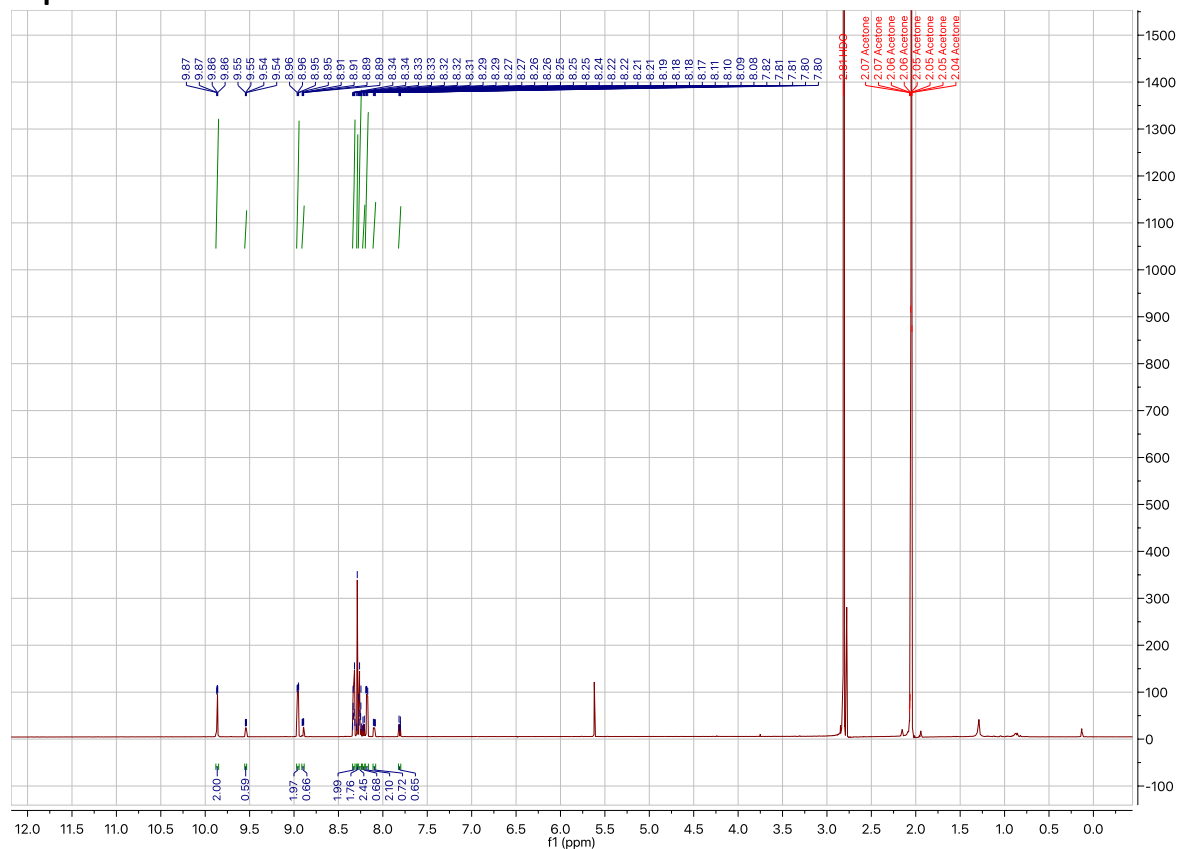

Figure S23.  $^1\text{H}$  NMR for  $[\text{Re}(\text{phen})(\text{CO})_3(\text{L6})]$ , RephenL6

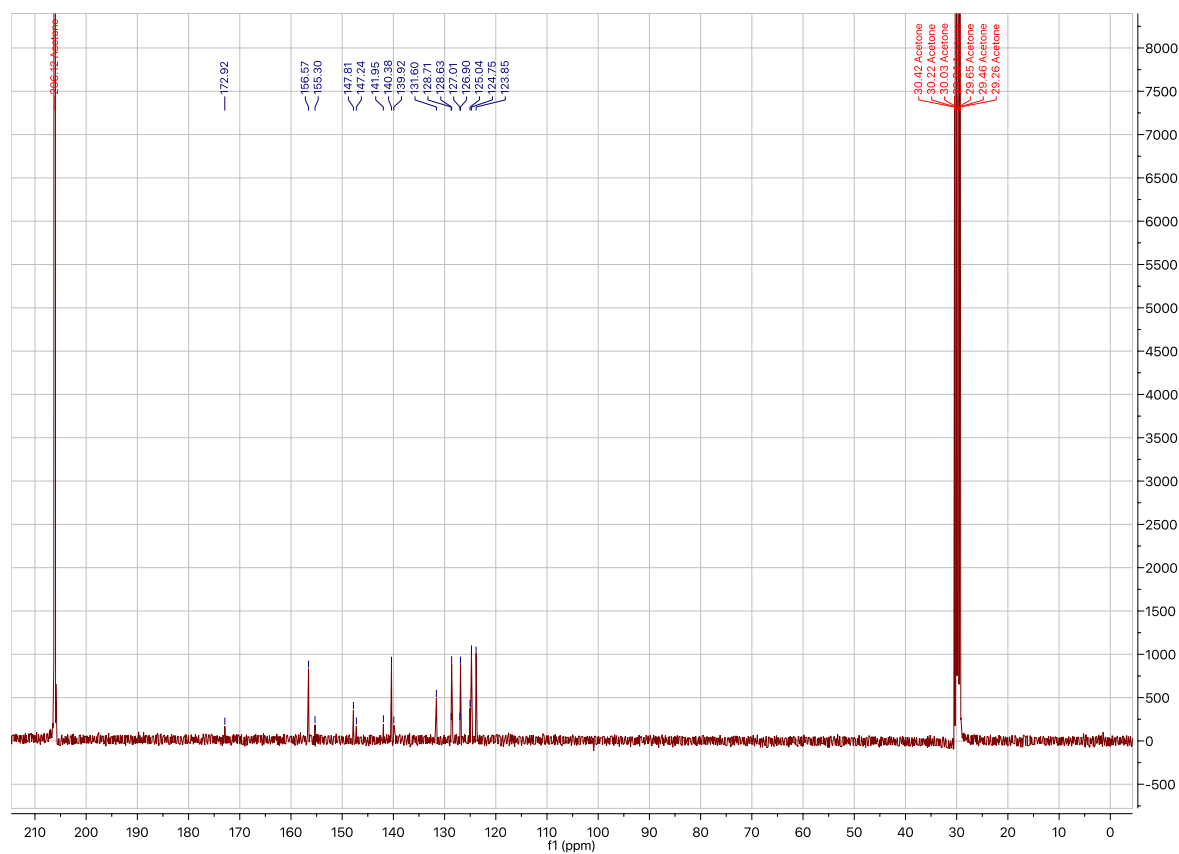

Figure S24.  $^{13}\text{C}$  NMR for  $[\text{Re}(\text{phen})(\text{CO})_3(\text{L6})]$ , RephenL6

Table S1. Crystallographic data for complexes **RebipyLn - RephenLn**

|                                    | <b>Rebipy1</b>                                                    | <b>Rebipy2</b>                                                 | <b>Rebipy3</b>                                                    | <b>Rebipy4</b>                                                    | <b>Rebipy5</b>                                                      | <b>Rebipy6</b>                                                    |
|------------------------------------|-------------------------------------------------------------------|----------------------------------------------------------------|-------------------------------------------------------------------|-------------------------------------------------------------------|---------------------------------------------------------------------|-------------------------------------------------------------------|
| <b>Chemical formula</b>            | C <sub>21</sub> H <sub>15</sub> N <sub>6</sub> O <sub>3</sub> ReS | C <sub>26</sub> N <sub>6</sub> O <sub>4</sub> ReS <sub>2</sub> | C <sub>21</sub> H <sub>15</sub> N <sub>6</sub> O <sub>4</sub> ReS | C <sub>22</sub> H <sub>18</sub> N <sub>7</sub> O <sub>3</sub> ReS | C <sub>23</sub> H <sub>16</sub> ClN <sub>6</sub> O <sub>4</sub> ReS | C <sub>23</sub> H <sub>18</sub> N <sub>7</sub> O <sub>6</sub> ReS |
| <b>M<sub>r</sub></b>               | 617.65                                                            | 698.64                                                         | 633.65                                                            | 646.69                                                            | 694.13                                                              | 706.70                                                            |
| <b>Temp (K)</b>                    | 123                                                               | 123                                                            | 123                                                               | 123                                                               | 123                                                                 | 123                                                               |
| <b>Crystal system, space group</b> | Monoclinic, P 2 <sub>1</sub> /c                                   | Triclinic, P -1                                                | Orthorhombic, pccn                                                | Monoclinic, P 2 <sub>1</sub> /c                                   | Orthorhombic, P2 <sub>1</sub> ca                                    | Orthorhombic, P2 <sub>1</sub> ca                                  |
| <b>a,b,c (Å)</b>                   | 19.8643(10)<br>9.4378(3)<br>11.9223(6)                            | 10.1365(2)<br>11.5551(2)<br>12.4450(3)                         | 19.7329(7)<br>18.0795(7)<br>12.6323(4)                            | 21.2128(12)<br>9.4134(4)<br>11.9069(6)                            | 12.9404(5)<br>9.4757(3)<br>20.6156(8)                               | 12.8312(4)<br>9.5879(3)<br>20.5152(5)                             |
| <b>V</b>                           | 2159.87(18)                                                       | 1388.02(5)                                                     | 4506.7(3)                                                         | 2306.9(2)                                                         | 2527.87(16)                                                         | 2523.87(13)                                                       |
| <b>Z</b>                           | 4                                                                 | 2                                                              | 8                                                                 | 4                                                                 | 4                                                                   | 4                                                                 |
| <b>W<sub>r</sub><sup>2</sup></b>   | 0.1302                                                            | 0.0838                                                         | 0.1063                                                            | 0.0999                                                            | 0.0932                                                              | 0.0827                                                            |
| <b>GOF</b>                         | 0.992                                                             | 0.992                                                          | 1.023                                                             | 1.008                                                             | 1.048                                                               | 1.032                                                             |
| <b>No. of reflections</b>          | 5487                                                              | 6817                                                           | 5924                                                              | 5076                                                              | 6320                                                                | 8397                                                              |
| <b>No. of parameters</b>           | 343                                                               | 343                                                            | 302                                                               | 377                                                               | 326                                                                 | 345                                                               |

|                                    | <b>RephenL1</b>                                                   | <b>RephenL2</b>                                                   | <b>RephenL3</b>                                                   | <b>RephenL4</b>                                                                                            | <b>RephenL5</b>                                                     | <b>RephenL6</b>                                                   |
|------------------------------------|-------------------------------------------------------------------|-------------------------------------------------------------------|-------------------------------------------------------------------|------------------------------------------------------------------------------------------------------------|---------------------------------------------------------------------|-------------------------------------------------------------------|
| <b>Chemical formula</b>            | C <sub>23</sub> H <sub>15</sub> N <sub>6</sub> O <sub>3</sub> ReS | C <sub>25</sub> H <sub>19</sub> N <sub>6</sub> O <sub>3</sub> ReS | C <sub>23</sub> H <sub>15</sub> N <sub>6</sub> O <sub>4</sub> ReS | C <sub>24</sub> H <sub>15</sub> N <sub>7</sub> O <sub>3</sub> ReS.<br>0.5(C <sub>3</sub> H <sub>6</sub> O) | C <sub>22</sub> H <sub>12</sub> ClN <sub>6</sub> O <sub>3</sub> ReS | C <sub>25</sub> H <sub>18</sub> N <sub>7</sub> O <sub>6</sub> ReS |
| <b>M<sub>r</sub></b>               | 641.67                                                            | 669.72                                                            | 657.67                                                            | 696.73                                                                                                     | 662.09                                                              | 730.72                                                            |
| <b>Temp (K)</b>                    | 123                                                               | 123                                                               | 123                                                               | 123                                                                                                        | 123                                                                 | 123                                                               |
| <b>Crystal system, space group</b> | Monoclinic, P 2 <sub>1</sub> /c                                   | Monoclinic, P 2 <sub>1</sub> /c                                   | Orthorhombic, P 2 <sub>1</sub> 2 <sub>1</sub> 2 <sub>1</sub>      | Triclinic, P -1                                                                                            | Monoclinic, P 2 <sub>1</sub> /c                                     | Orthorhombic, P2 <sub>1</sub> ca                                  |
| <b>a,b,c (Å)</b>                   | 11.6710(3)<br>13.1288(4)<br>14.2480(4)                            | 14.3598(10)<br>11.2264(6)<br>15.8108(9)                           | 11.5391(3)<br>13.2808(3)<br>14.9093(4)                            | 6.79070(10)<br>9.3555(2)<br>19.8603(3)                                                                     | 7.3952(2)<br>17.0085(6)<br>17.8443(6)                               | 22.6481(11)<br>7.2466(3)<br>15.5837(9)                            |
| <b>V</b>                           | 2182.95(11)                                                       | 2375.3(3)                                                         | 2284.83(10)                                                       | 1244.72(4)                                                                                                 | 2200.10(12)                                                         | 2557.6(2)                                                         |
| <b>Z</b>                           | 4                                                                 | 4                                                                 | 4                                                                 | 2                                                                                                          | 4                                                                   | 4                                                                 |
| <b>W<sub>r</sub><sup>2</sup></b>   | 0.0678,                                                           | 0.0909                                                            | 0.0539                                                            | 0.0734                                                                                                     | 0.0808                                                              | 0.1004                                                            |
| <b>GOF</b>                         | 1.038                                                             | 0.992                                                             | 0.999                                                             | 0.982                                                                                                      | 1.025                                                               | 1.019                                                             |
| <b>No. of reflections</b>          | 7669                                                              | 5771                                                              | 8720                                                              | 13426                                                                                                      | 8699                                                                | 4802                                                              |
| <b>No. of parameters</b>           | 308                                                               | 328                                                               | 318                                                               | 359                                                                                                        | 307                                                                 | 363                                                               |

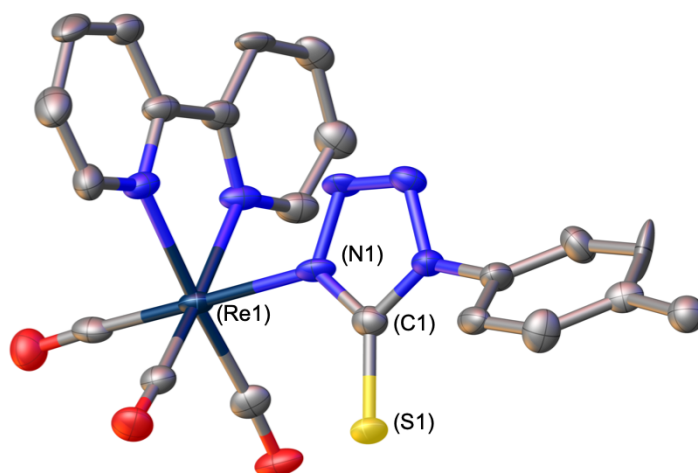

Figure S25. Molecular structure of **RebipyL1**, showing the N1 bound tetrazole. Hydrogen atoms omitted for clarity. Thermal ellipsoids shown at 50% probability.

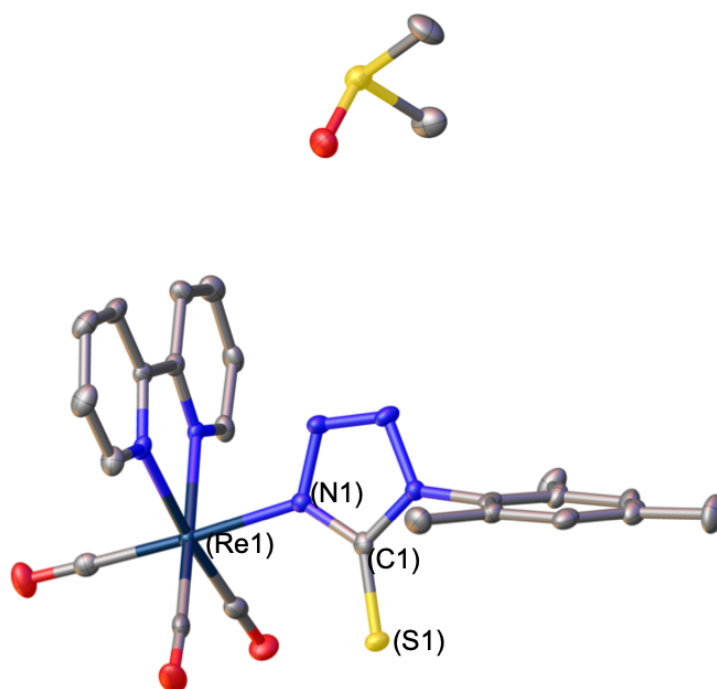

Figure S26. Molecular structure of **RebipyL2**, showing the N1 bound tetrazole. Hydrogen atoms omitted for clarity. Thermal ellipsoids shown at 50% probability.

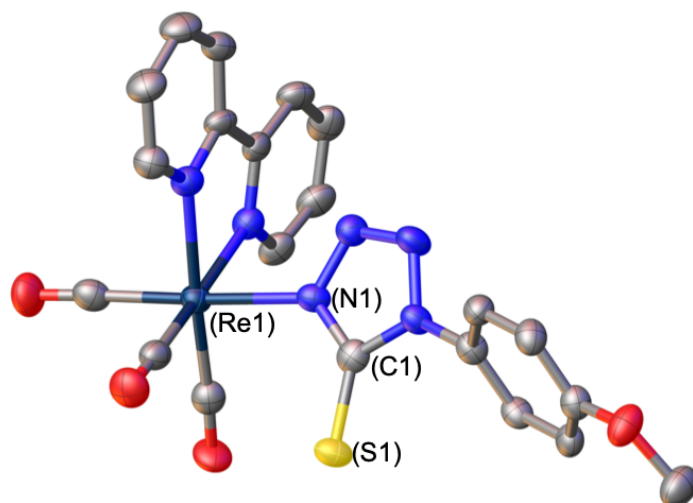

Figure S27. Molecular structure of **RebipyL3**, showing the N1 bound tetrazole. Hydrogen atoms omitted for clarity. Thermal ellipsoids shown at 50% probability.

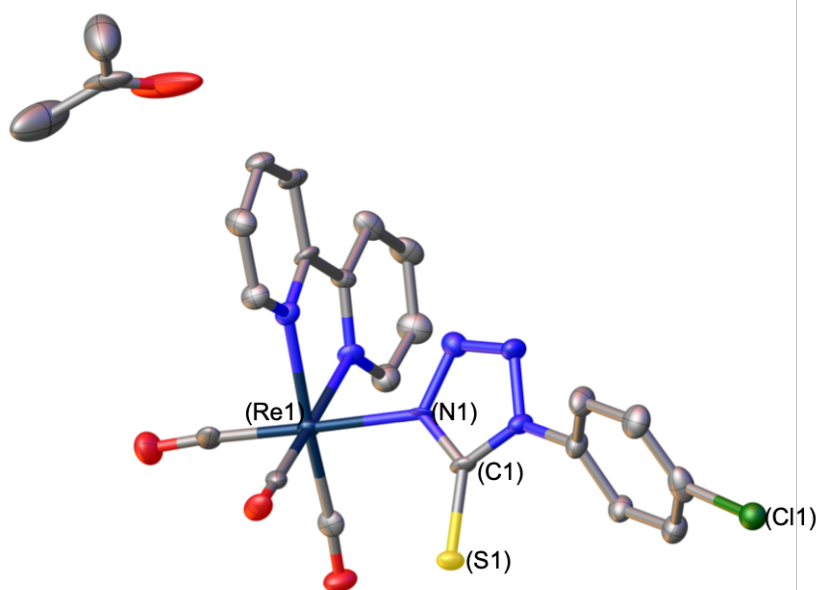

Figure S28. Molecular structure of **RebipyL5**, showing the N1 bound tetrazole. Hydrogen atoms omitted for clarity. Thermal ellipsoids shown at 50% probability.



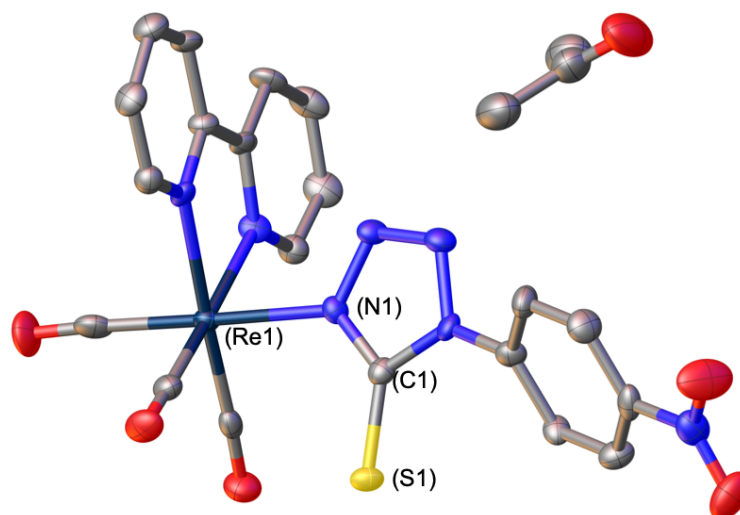

Figure S29. Molecular structure of **RebipyL6**, showing the N1 bound tetrazole. Hydrogen atoms omitted for clarity. Thermal ellipsoids shown at 50% probability.

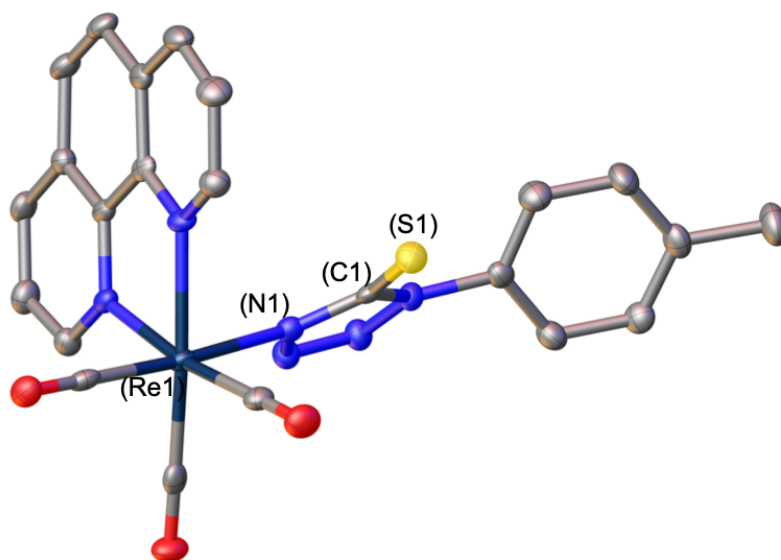

Figure S30. Molecular structure of **RephenL1**, showing the N1 bound tetrazole. Hydrogen atoms omitted for clarity. Thermal ellipsoids shown at 50% probability.

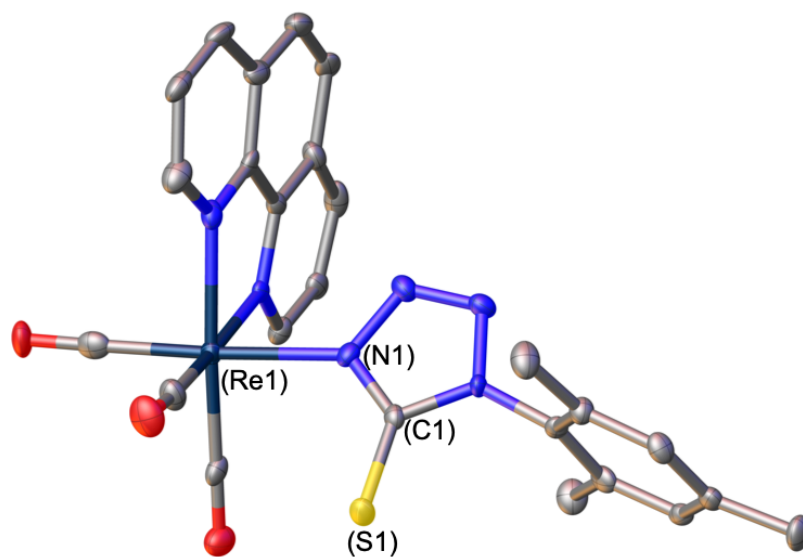

Figure S31. Molecular structure of **RephenL2**, showing the N1 bound tetrazole. Hydrogen atoms omitted for clarity. Thermal ellipsoids shown at 50% probability.

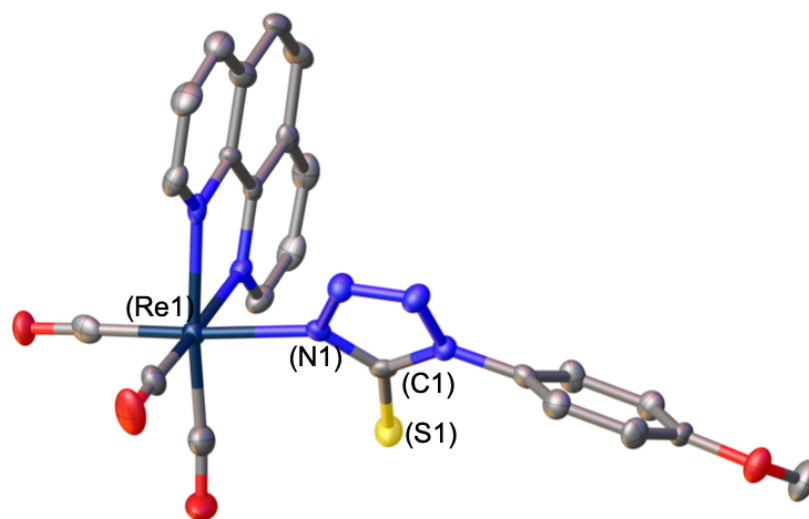

Figure S32. Molecular structure of **RephenL3**, showing the N1 bound tetrazole. Hydrogen atoms omitted for clarity. Thermal ellipsoids shown at 50% probability.

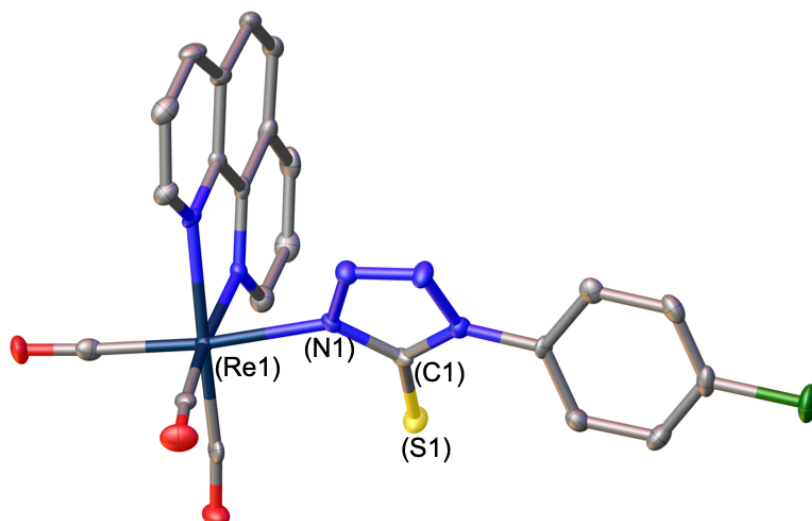

Figure S33. Molecular structure of **RephenL5**, showing the N1 bound tetrazole. Hydrogen atoms omitted for clarity. Thermal ellipsoids shown at 50% probability.

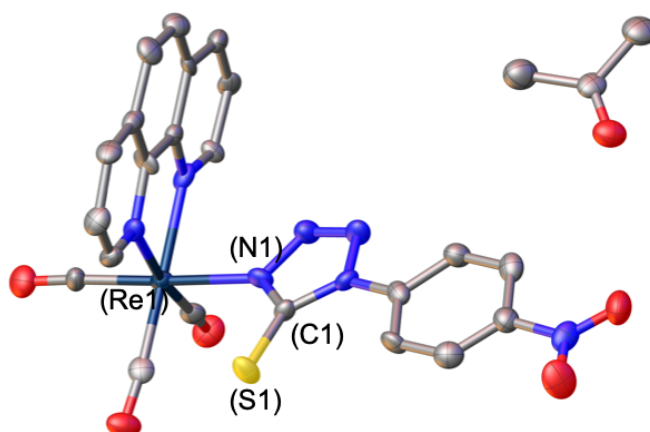

Figure S34. Molecular structure of **RephenL6**, showing the N1 bound tetrazole. Hydrogen atoms omitted for clarity. Thermal ellipsoids shown at 50% probability.

LS\_2\_108 (Coupled TwoTheta/Theta)

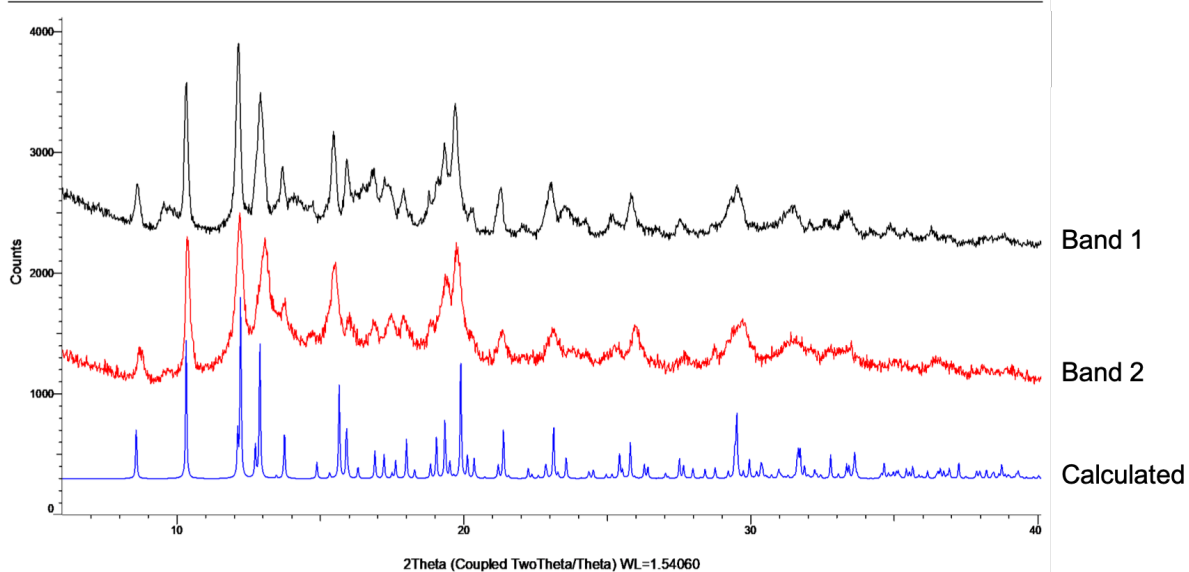

Figure S35. PXR D spectra for **RebipyL4**. Top (in black): solid material obtained in ‘band one’ from silica gel chromatography column; Middle (in red): solid material obtained in ‘band two’ from silica gel chromatography column; bottom (in blue): calculated PXR D using the crystal data obtained for **RebipyL4**.

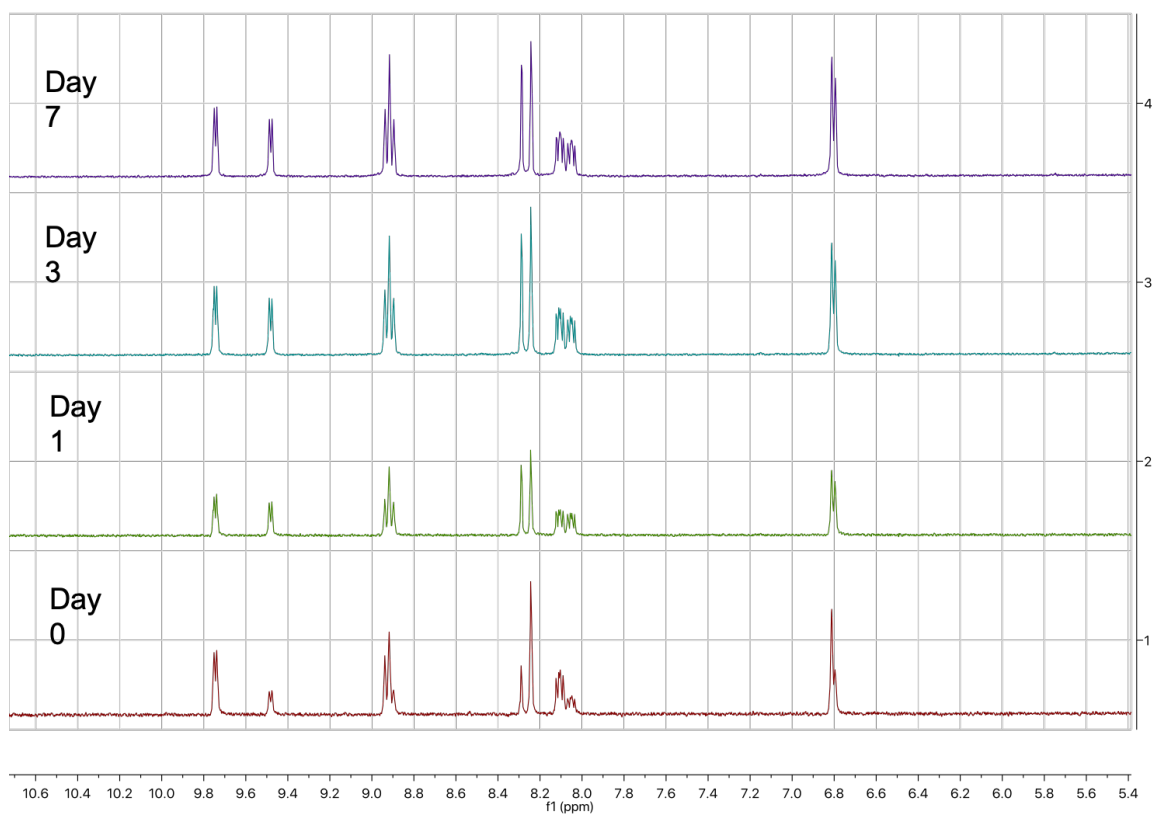

Figure S36. **RephenL2** seven-day stability in DMSO

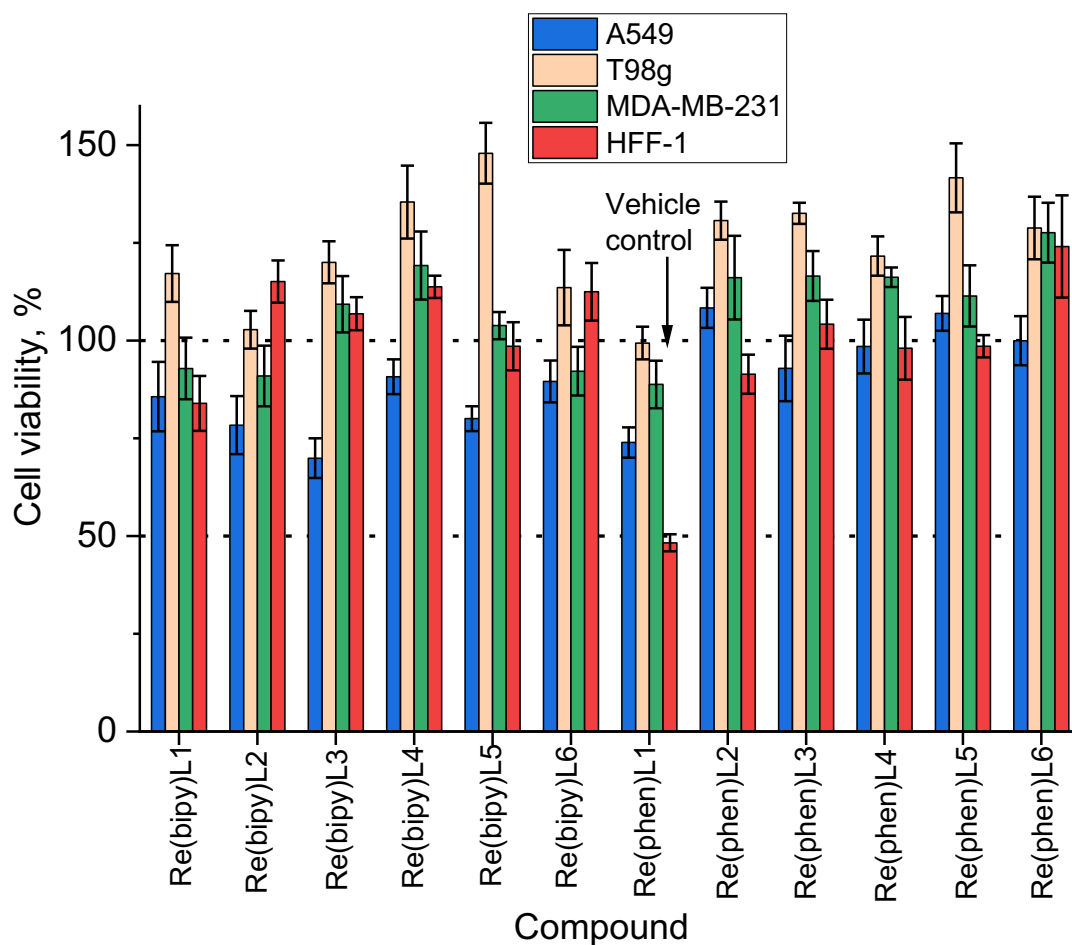

Figure S37 Comparison of anti-proliferative activities (MTT assays) of the Re(I) complexes (5.0  $\mu$ M Re) in a panel of cancer and non-cancer cell lines in 72 h assays. Error bars represent mean values and standard deviations of two independent experiments, each including six replicate wells (n=12).

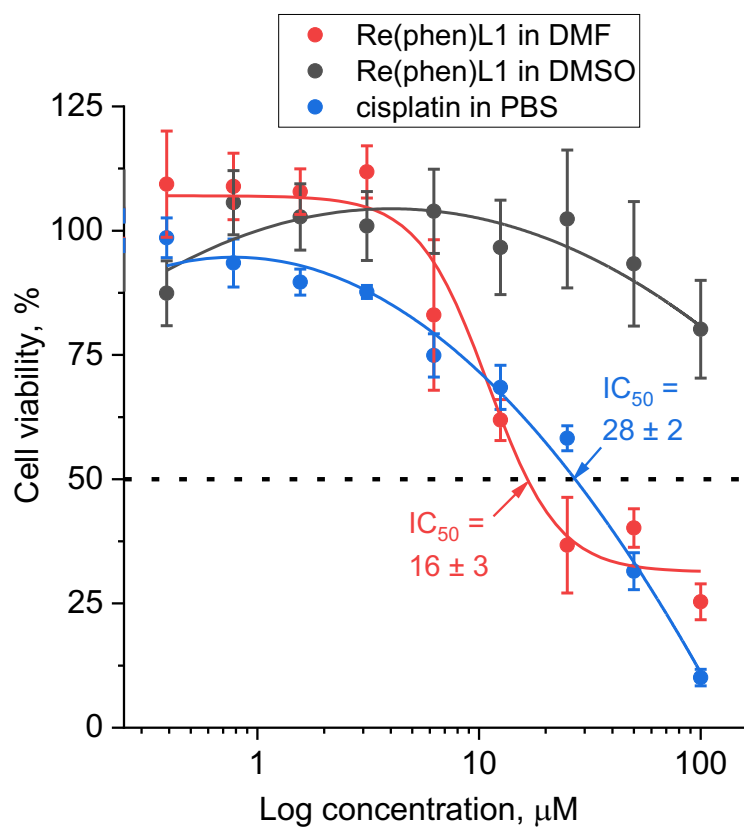

Figure S38 Comparison of concentration-viability curves for 72h assays in T98g cells for **Re(phen)L1** (using 10 mM stock solutions in DMF or DMSO) and cisplatin (using 1.0 mM stock solution in PBS). Points and error bars represent mean values and standard deviations of six replicate wells, and lines are sigmoidal or polynomial fits of experimental data.

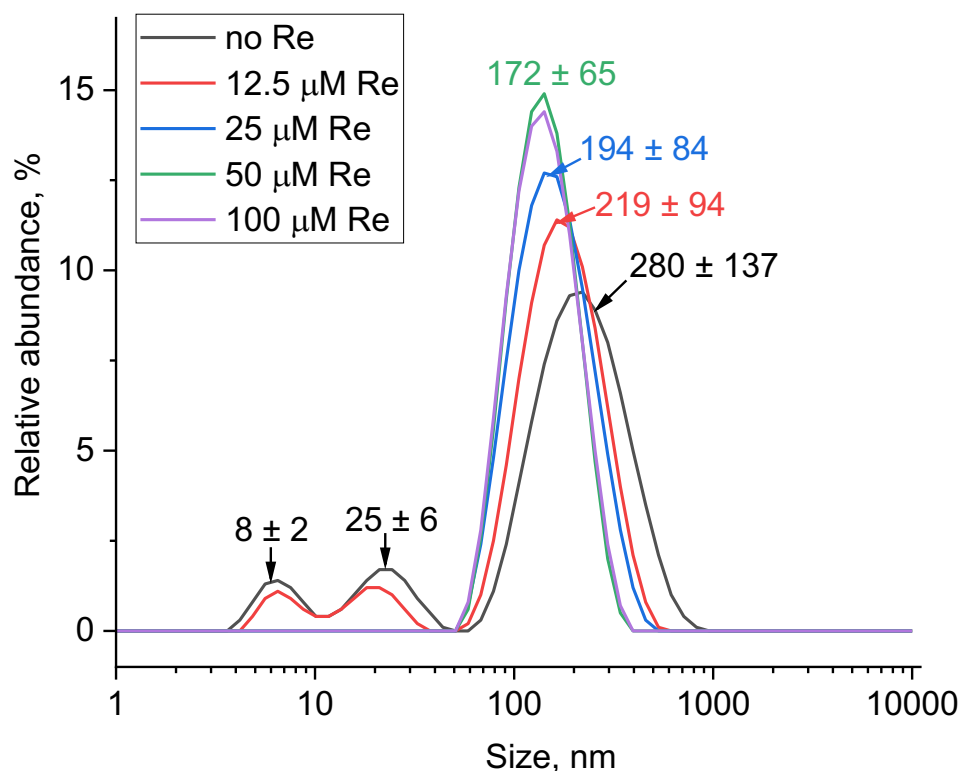

Figure S39 Changes in DLS profiles of cell culture medium (Advanced DMEM with 2% FCS) in the presence of increasing concentrations of **Re(phen)L1**. Media samples were incubated with **Re(phen)L1** for 2 h at 310 K before the measurements. DLS measurements were performed with a Malvern ZetaSizer NanoS instrument (173° scattering angle, 298 K) with ZEN0040 disposable cuvettes (Malvern Panalytical, Malvern, UK). Attribution of the peaks:  $8 \pm 2$  nm and  $25 \pm 6$  nm are due to proteins (predominantly albumin) contained in the medium;  $280 \pm 137$  nm (in the absence of Re) is due to protein aggregates;  $172 \pm 65$  nm (at high Re concentrations) is due to **Re(phen)L1** aggregates, and  $219 \pm 94$  nm and  $194 \pm 84$  nm (at lower Re concentrations) are due to a combination of protein and **Re(phen)L1** aggregates. Note that the peak intensities depend on the particle size and are not proportionate to concentrations of the particles.
